# Supplementary material for: Sex Differences in Oxycodone/Naloxone vs. Tapentadol in Chronic Non-Cancer Pain: An Observational Real-World Study
Source: MDPI journal article supplement (doi:10.3390/biomedicines10102468), 2022-10-02
Supplement: s1 [file s1]

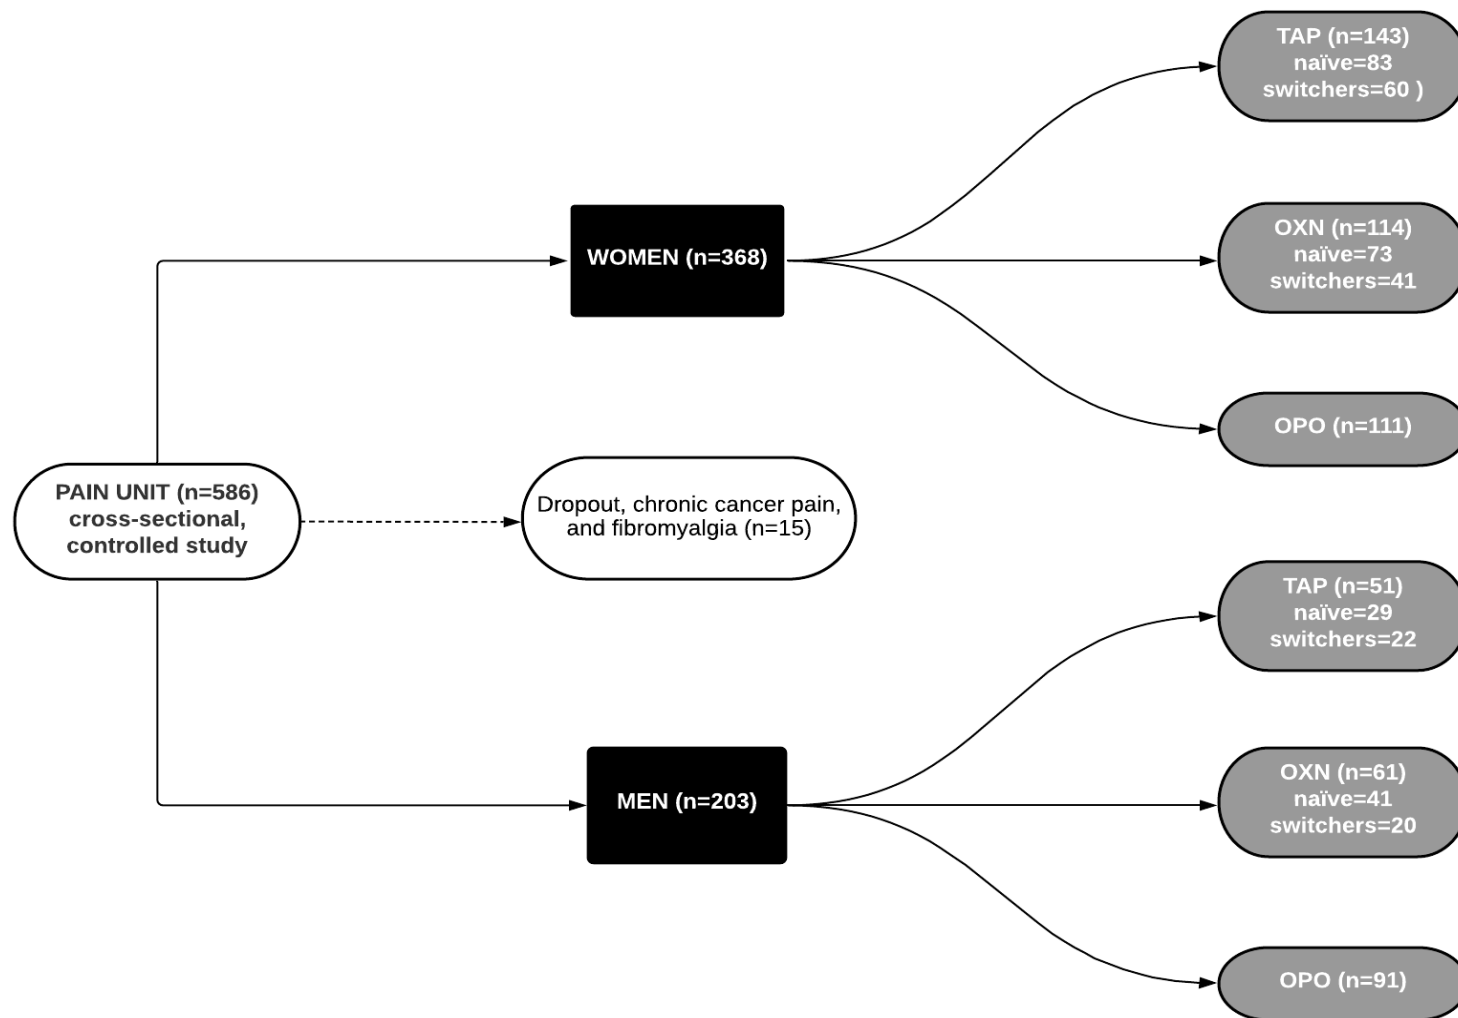

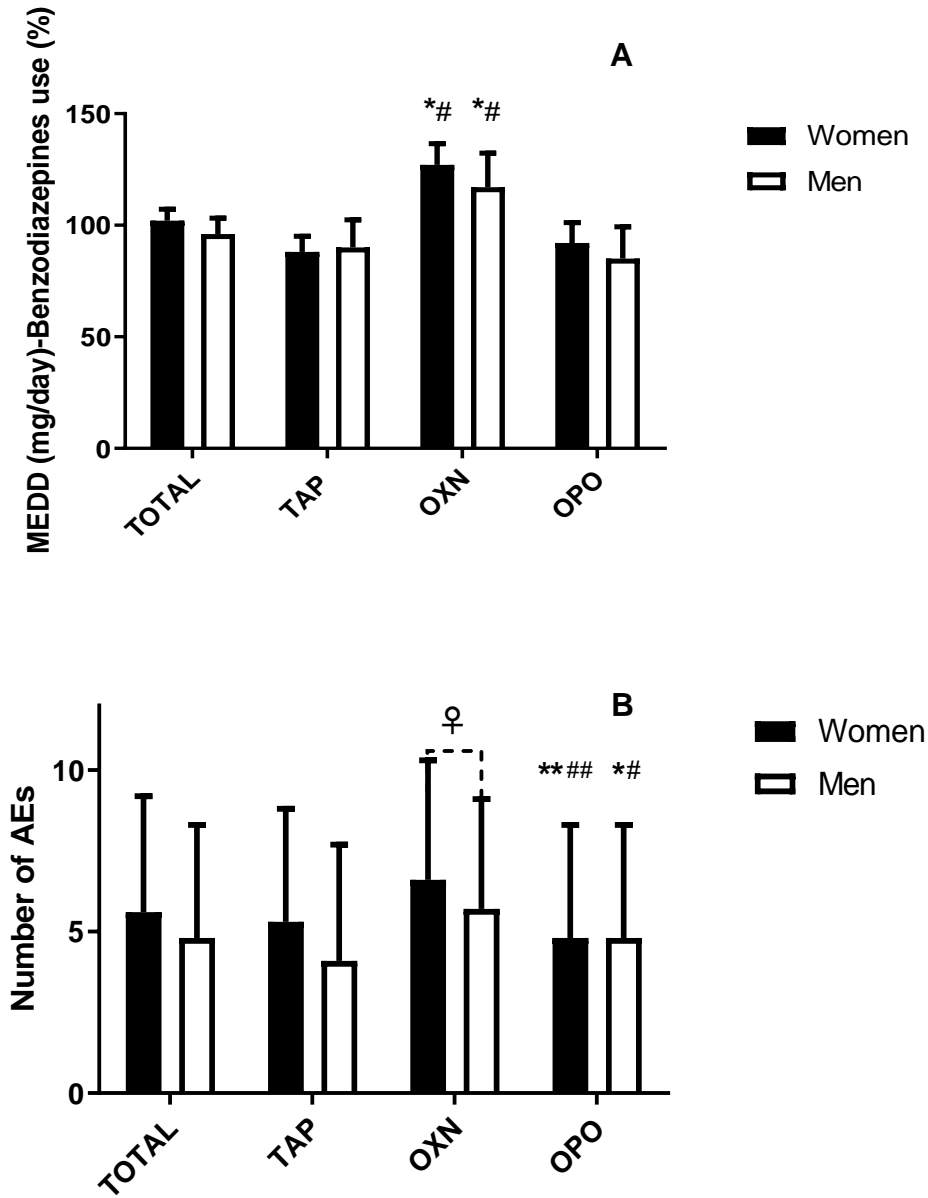

Figure S1: Morphine Equivalent Daily Dose (MEDD) and Number of Adverse Events (AEs) according to the group and depending on sex. Note: \* denotes  $p < 0.05$  comparing men between groups, \*\* denotes  $p < 0.01$  comparing women between groups. denotes  $p < 0.05$  comparing women with men of the same group. # Denotes  $p < 0.05$  comparing TAP vs. OXN, ## denotes  $p < 0.01$  comparing TAP vs. OXN.

**Table S1.-** Multiple Linear regression of descriptive, clinical and pharmacological parameters with VAS pain, VAS relief, quality of life, and Morphine Equivalent Daily Dose as dependent variable in women and men groups.

| Pain intensity  | Model p-value<br>R <sup>2</sup> | Predictive<br>variables   | Beta coefficient (CI<br>95%) | p-value                |
|-----------------|---------------------------------|---------------------------|------------------------------|------------------------|
| Women           | <0.001<br>0.377                 | Pain relief               | -0.381 (-0.47-(-0.29))       | <0.001                 |
|                 |                                 | Quality of life           | -0.021 (-0.03-0.009)         | <0.001                 |
|                 |                                 | Number of AE              | 0.147 (0.07-0.22)            | <0.001                 |
|                 |                                 | Use of<br>Neuromodulators | 0.656 (0.17-1.14)            | 0.008                  |
| Men             | <0.001<br>0.326                 | Pain Relief               | -0.373 (-0.50-(-0.24))       | <0.010                 |
|                 |                                 | Quality of life           | -0.02 (-0.04-(-0.003))       | 0.023                  |
|                 |                                 | Number of AE              | 0.122 (0.01- 0.23)           | 0.032                  |
|                 |                                 | Use of<br>Neuromodulators | -0.819 (-1.6-(-0.03))        | 0.040                  |
| MEDD            |                                 |                           |                              |                        |
| Women           | 0.033                           | Pain relief               | 3.215 (-0.48-6.91)           | 0.045                  |
|                 | 0.016                           | Number of AE              | 3.490 (0.431-6.548)          | 0.025                  |
| Pain relief     |                                 |                           |                              |                        |
| Men             | 3.069x10 <sup>-11</sup>         | Quality of life           | 0.029 (0.01-0.04)            | 0.001                  |
|                 | 0.2441                          | Pain intensity            | -0.400 (-0.54-(-0.25))       | 1.81x10 <sup>-7</sup>  |
| Women           | 2.2x10 <sup>-16</sup>           | Quality of life           | 0.031 (0.02-04)              | 2.51x10 <sup>-6</sup>  |
|                 | 0.241                           | Pain intensity            | -0.364 (-0.47(-0.26))        | 6.91x10 <sup>-11</sup> |
| Quality of life |                                 |                           |                              |                        |
| Women           | 5.5x10 <sup>-16</sup>           | Pain relief               | 2.07 (1.15-2.87)             | 5.87x10 <sup>-6</sup>  |
|                 | 0.205                           | Pain intensity            | -1.51 (--2.45(-0.57))        | 0.001                  |
|                 |                                 | AE                        | -1.13 (-1.80(--0.45))        | 0.001                  |

---

|     |                                |                |                       |        |
|-----|--------------------------------|----------------|-----------------------|--------|
| Men | 1.47x10 <sup>-7</sup><br>0.198 | Pain relief    | 2.049 (0.85-3.24)     | 0.0008 |
|     |                                | Pain intensity | -1.306 (-2.58(-0.02)) | 0.045  |
|     |                                | Number of AE   | -1 (-1.92(-0.07))     | 0.034  |
|     |                                | Antidepressant | -7.14 (-13.77(-0.52)) | 0.034  |

---

**Table S2-** Multiple Linear regression of descriptive, clinical, and pharmacological parameters with VAS pain, VAS relief and quality of life as dependent variable in women and men depending upon pharmacological treatment.

| Regression Equation | $\beta$ Coefficient | SE | T | Sig. T | 95% CI for Exp (B) |  | R <sup>2</sup> | F test | p |
|---------------------|---------------------|----|---|--------|--------------------|--|----------------|--------|---|
|                     |                     |    |   |        |                    |  |                |        |   |
|                     |                     |    |   |        |                    |  |                |        |   |
|                     |                     |    |   |        |                    |  |                |        |   |
|                     |                     |    |   |        |                    |  |                |        |   |
|                     |                     |    |   |        |                    |  |                |        |   |
|                     |                     |    |   |        |                    |  |                |        |   |
|                     |                     |    |   |        |                    |  |                |        |   |
|                     |                     |    |   |        |                    |  |                |        |   |
|                     |                     |    |   |        |                    |  |                |        |   |
|                     |                     |    |   |        |                    |  |                |        |   |
|                     |                     |    |   |        |                    |  |                |        |   |
|                     |                     |    |   |        |                    |  |                |        |   |
|                     |                     |    |   |        |                    |  |                |        |   |
|                     |                     |    |   |        |                    |  |                |        |   |
|                     |                     |    |   |        |                    |  |                |        |   |
|                     |                     |    |   |        |                    |  |                |        |   |
|                     |                     |    |   |        |                    |  |                |        |   |
|                     |                     |    |   |        |                    |  |                |        |   |
|                     |                     |    |   |        |                    |  |                |        |   |
|                     |                     |    |   |        |                    |  |                |        |   |
|                     |                     |    |   |        |                    |  |                |        |   |
|                     |                     |    |   |        |                    |  |                |        |   |
|                     |                     |    |   |        |                    |  |                |        |   |
|                     |                     |    |   |        |                    |  |                |        |   |
|                     |                     |    |   |        |                    |  |                |        |   |
|                     |                     |    |   |        |                    |  |                |        |   |
|                     |                     |    |   |        |                    |  |                |        |   |
|                     |                     |    |   |        |                    |  |                |        |   |
|                     |                     |    |   |        |                    |  |                |        |   |
|                     |                     |    |   |        |                    |  |                |        |   |
|                     |                     |    |   |        |                    |  |                |        |   |
|                     |                     |    |   |        |                    |  |                |        |   |
|                     |                     |    |   |        |                    |  |                |        |   |
|                     |                     |    |   |        |                    |  |                |        |   |
|                     |                     |    |   |        |                    |  |                |        |   |
|                     |                     |    |   |        |                    |  |                |        |   |
|                     |                     |    |   |        |                    |  |                |        |   |
|                     |                     |    |   |        |                    |  |                |        |   |
|                     |                     |    |   |        |                    |  |                |        |   |
|                     |                     |    |   |        |                    |  |                |        |   |
|                     |                     |    |   |        |                    |  |                |        |   |
|                     |                     |    |   |        |                    |  |                |        |   |
|                     |                     |    |   |        |                    |  |                |        |   |
|                     |                     |    |   |        |                    |  |                |        |   |
|                     |                     |    |   |        |                    |  |                |        |   |
|                     |                     |    |   |        |                    |  |                |        |   |
|                     |                     |    |   |        |                    |  |                |        |   |
|                     |                     |    |   |        |                    |  |                |        |   |
|                     |                     |    |   |        |                    |  |                |        |   |
|                     |                     |    |   |        |                    |  |                |        |   |
|                     |                     |    |   |        |                    |  |                |        |   |
|                     |                     |    |   |        |                    |  |                |        |   |
|                     |                     |    |   |        |                    |  |                |        |   |
|                     |                     |    |   |        |                    |  |                |        |   |
|                     |                     |    |   |        |                    |  |                |        |   |
|                     |                     |    |   |        |                    |  |                |        |   |
|                     |                     |    |   |        |                    |  |                |        |   |
|                     |                     |    |   |        |                    |  |                |        |   |
|                     |                     |    |   |        |                    |  |                |        |   |
|                     |                     |    |   |        |                    |  |                |        |   |
|                     |                     |    |   |        |                    |  |                |        |   |
|                     |                     |    |   |        |                    |  |                |        |   |
|                     |                     |    |   |        |                    |  |                |        |   |
|                     |                     |    |   |        |                    |  |                |        |   |
|                     |                     |    |   |        |                    |  |                |        |   |
|                     |                     |    |   |        |                    |  |                |        |   |
|                     |                     |    |   |        |                    |  |                |        |   |
|                     |                     |    |   |        |                    |  |                |        |   |
|                     |                     |    |   |        |                    |  |                |        |   |
|                     |                     |    |   |        |                    |  |                |        |   |
|                     |                     |    |   |        |                    |  |                |        |   |
|                     |                     |    |   |        |                    |  |                |        |   |
|                     |                     |    |   |        |                    |  |                |        |   |
|                     |                     |    |   |        |                    |  |                |        |   |
|                     |                     |    |   |        |                    |  |                |        |   |
|                     |                     |    |   |        |                    |  |                |        |   |
|                     |                     |    |   |        |                    |  |                |        |   |
|                     |                     |    |   |        |                    |  |                |        |   |
|                     |                     |    |   |        |                    |  |                |        |   |
|                     |                     |    |   |        |                    |  |                |        |   |
|                     |                     |    |   |        |                    |  |                |        |   |
|                     |                     |    |   |        |                    |  |                |        |   |
|                     |                     |    |   |        |                    |  |                |        |   |
|                     |                     |    |   |        |                    |  |                |        |   |
|                     |                     |    |   |        |                    |  |                |        |   |
|                     |                     |    |   |        |                    |  |                |        |   |
|                     |                     |    |   |        |                    |  |                |        |   |
|                     |                     |    |   |        |                    |  |                |        |   |
|                     |                     |    |   |        |                    |  |                |        |   |
|                     |                     |    |   |        |                    |  |                |        |   |
|                     |                     |    |   |        |                    |  |                |        |   |
|                     |                     |    |   |        |                    |  |                |        |   |
|                     |                     |    |   |        |                    |  |                |        |   |
|                     |                     |    |   |        |                    |  |                |        |   |
|                     |                     |    |   |        |                    |  |                |        |   |
|                     |                     |    |   |        |                    |  |                |        |   |
|                     |                     |    |   |        |                    |  |                |        |   |
|                     |                     |    |   |        |                    |  |                |        |   |
|                     |                     |    |   |        |                    |  |                |        |   |
|                     |                     |    |   |        |                    |  |                |        |   |
|                     |                     |    |   |        |                    |  |                |        |   |
|                     |                     |    |   |        |                    |  |                |        |   |
|                     |                     |    |   |        |                    |  |                |        |   |
|                     |                     |    |   |        |                    |  |                |        |   |
|                     |                     |    |   |        |                    |  |                |        |   |

|                                  |        |       |        |        |        |        |       |       |        |
|----------------------------------|--------|-------|--------|--------|--------|--------|-------|-------|--------|
| <b>Adverse events</b>            | 0.177  | 0.052 | 3.361  | <0.001 | 0.072  | 0.281  |       |       |        |
| <b>TAP Women pain relief</b>     |        |       |        |        |        |        |       |       |        |
| <b>Constant</b>                  | 5.877  | 0.882 | 6.662  | <0.001 | 4.131  | 7.622  |       |       |        |
| <b>Pain intensity</b>            | -0.522 | 0.085 | -6.142 | <0.001 | -0.690 | -0.354 | 0.362 | 36.93 | <0.001 |
| <b>Quality of life</b>           | 0.022  | 0.010 | 2.138  | 0.034  | 0.001  | 0.043  |       |       |        |
| <b>TAP Women quality of life</b> |        |       |        |        |        |        |       |       |        |
| <b>Constant</b>                  | 58.155 | 6.647 | 8.753  | <0.001 | 45.033 | 71.336 |       |       |        |
| <b>Pain intensity</b>            | -3.155 | 0.743 | -4.190 | <0.001 | -4.586 | -1.644 | 0.275 | 24.67 | <0.001 |
| <b>Pain relief</b>               | 1.511  | 0.707 | 2.138  | 0.034  | 0.113  | 2.910  |       |       |        |
| <b>TAP Men pain intensity</b>    |        |       |        |        |        |        |       |       |        |
| <b>Constant</b>                  | 8.237  | 0.758 | 10.860 | <0.001 | 6.710  | 9.764  |       |       |        |
| <b>Quality of life</b>           | -0.049 | 0.014 | -3.415 | 0.001  | -0.079 | -0.020 | 0.202 | 11.66 | 0.001  |
| <b>TAP Men pain relief</b>       |        |       |        |        |        |        |       |       |        |
| <b>Constant</b>                  | 1.315  | 0.862 | 1.526  | 0.133  | -0.419 | 3.051  |       |       |        |
| <b>Quality of life</b>           | 0.049  | 0.016 | 2.702  | 0.009  | 0.011  | 0.078  | 0.137 | 7.302 | 0.009  |
| <b>TAP Men quality of life</b>   |        |       |        |        |        |        |       |       |        |
| <b>Constant</b>                  | 58.659 | 9.933 | 5.905  | <0.001 | 38.652 | 78.665 |       |       |        |
| <b>Pain intensity</b>            | -3.283 | 1.240 | -2.648 | 0.011  | -5.779 | -0.786 | 0.253 | 7.635 | 0.001  |
| <b>Pain relief</b>               | 1.992  | 1.134 | 1.756  | 0.061  | -0.292 | 4.276  |       |       |        |
| <b>OXN Women pain intensity</b>  |        |       |        |        |        |        |       |       |        |
| <b>Constant</b>                  | 10.322 | 1.086 | 9.503  | <0.001 | 8.170  | 12.475 |       |       |        |
| <b>Pain relief</b>               | -0.44  | 0.071 | -5.779 | <0.001 | -0.556 | -0.272 |       |       |        |
| <b>Anxiolytics</b>               | 1.139  | 0.453 | 2.514  | 0.013  | 0.241  | 2.038  | 0.293 | 15.38 | <0.001 |
| <b>Age</b>                       | -0.043 | 0.016 | -2.632 | 0.009  | -0.076 | -0.010 |       |       |        |
| <b>OXN Women pain relief</b>     |        |       |        |        |        |        |       |       |        |
| <b>Constant</b>                  | 4.684  | 0.851 | 5.499  | <0.001 | 2.995  | 6.372  |       |       |        |
| <b>Pain intensity</b>            | -0.481 | 0.089 | -5.396 | <0.001 | -0.658 | -0.304 |       |       |        |
| <b>Quality of life</b>           | 1.285  | 0.484 | 2.653  | 0.009  | 0.325  | 2.245  | 0.361 | 20.55 | <0.001 |
| <b>Anxiolytics</b>               | 0.040  | 0.010 | 4.017  | <0.001 | 0.020  | 0.060  |       |       |        |
| <b>OXN Women quality of life</b> |        |       |        |        |        |        |       |       |        |
| <b>Constant</b>                  | 46.513 | 5.357 | 8.681  | <0.001 | 35.893 | 57.133 |       |       |        |
| <b>Pain relief</b>               | 2.620  | 0.650 | 4.025  | <0.001 | 1.329  | 3.910  | 0.294 | 15.01 | <0.001 |

[illegible]
